# Supplementary material
Source: PubMed Central journal article supplement (PMC2975200)
Supplement: supp_M110.126904_jbc.M110.126904-1.pdf [file supp_M110.126904_jbc.M110.126904-1.pdf]

# Supplemental Fig. 1

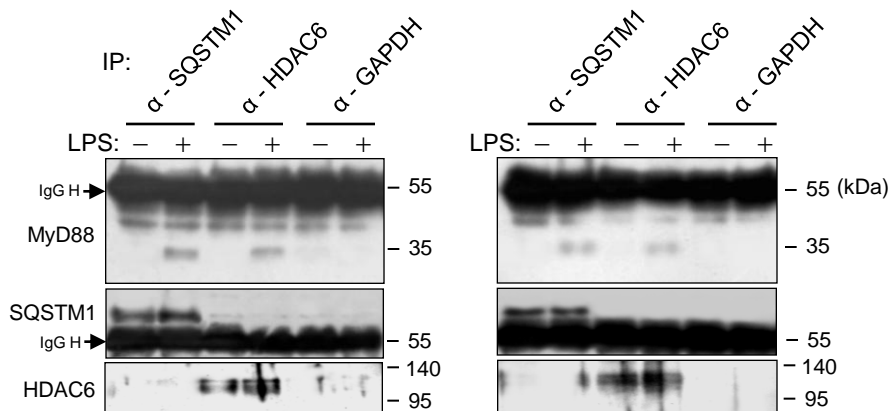

Immunoblot analysis of endogenous MyD88 coimmunoprecipitated with SQSTM1 and HDAC6. RAW264.7 cells were left unstimulated or stimulated with 1  $\mu\text{g/ml}$  LPS for 1 h. Then, immunoprecipitation (IP) using Dynabeads protein A with anti-SQSTM1, anti-HDAC6 or anti-GAPDH antibody was carried out with clarified cell lysates, followed by immunoblotting with anti-MyD88, anti-SQSTM1 and anti-HDAC6 antibodies. Three independent experiments were carried out and another result is shown in Fig. 3B.
